# Supplementary material for: Genome-Wide Survey of Large Rare Copy Number Variants in Alzheimer’s Disease Among Caribbean Hispanics
Source: PubMed Central journal article supplement (PMC3276183; doi:10.1534/g3.111.000869), 2012-01-01
Supplement: supp_2.1.71_000869SI.pdf [file supp_2.1.71_000869SI.pdf]

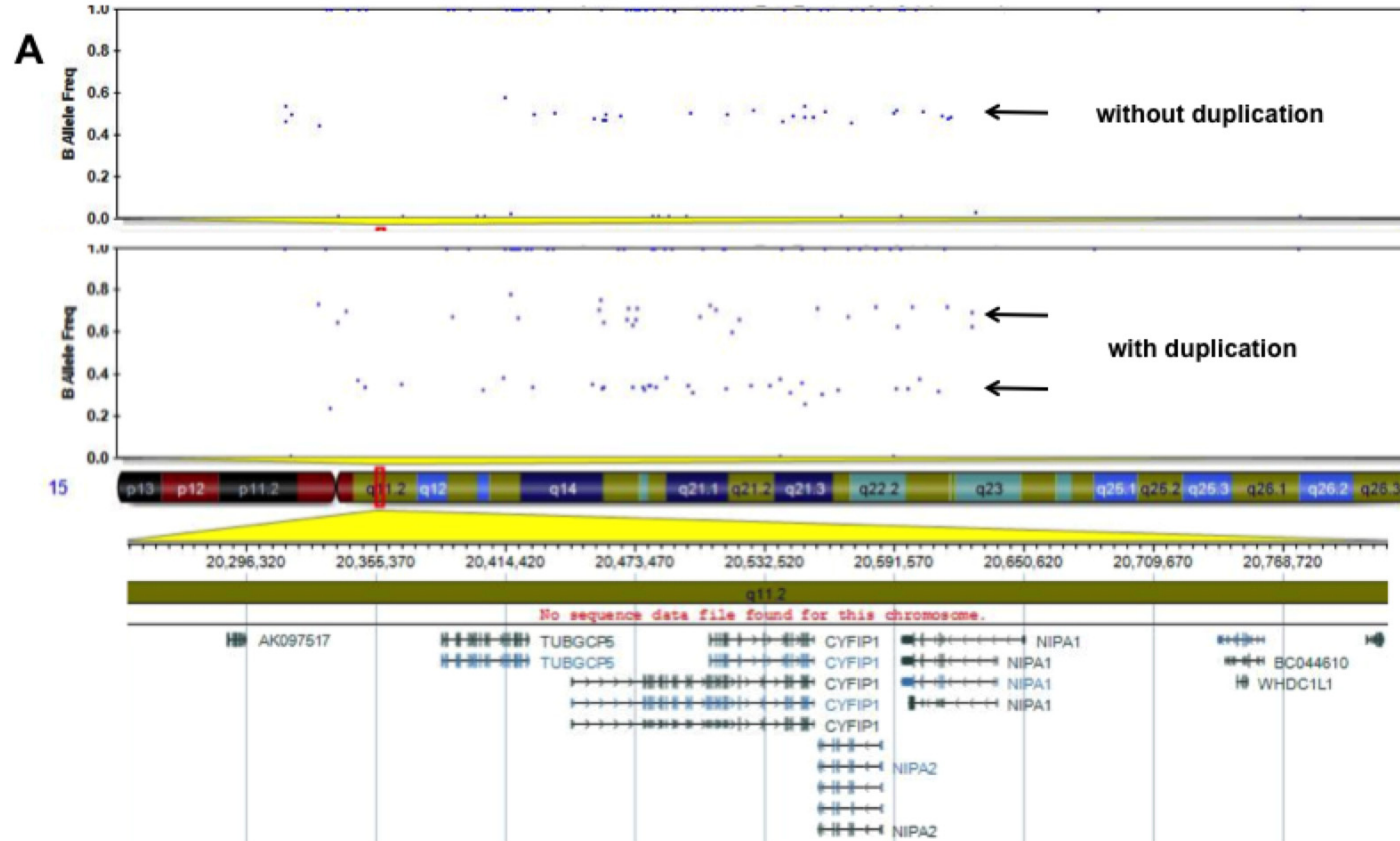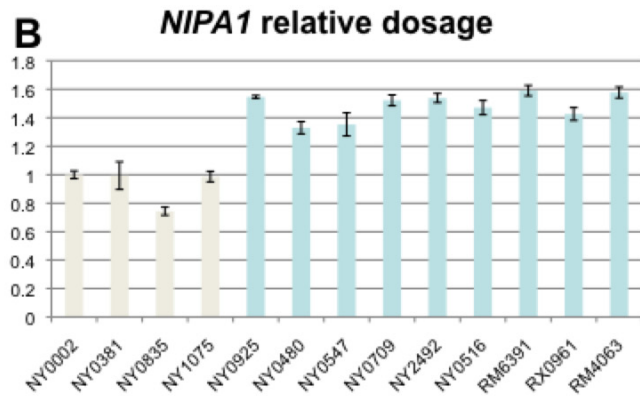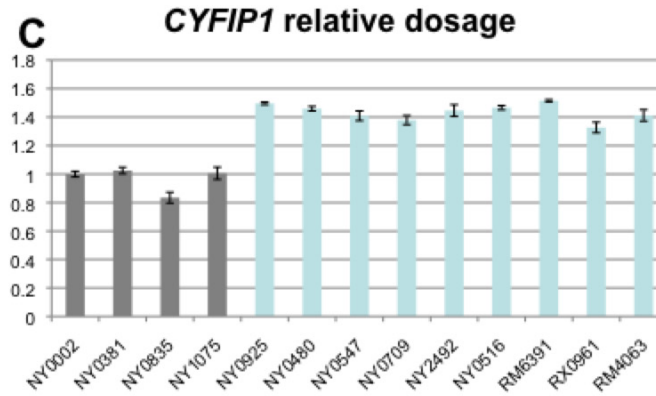

**Figure S1** Analyses of a duplication on chromosome 15q11.2. (A) A split in the B-allele frequency was observed in 10 cases and 3 controls due to a duplication of chromosome 15q11.2. (B) and (C) show the results of quantitative PCR that confirmed the presence of a duplication for the NIPA1 and CYFIP1 loci, respectively. The samples with duplications are highlighted in blue.

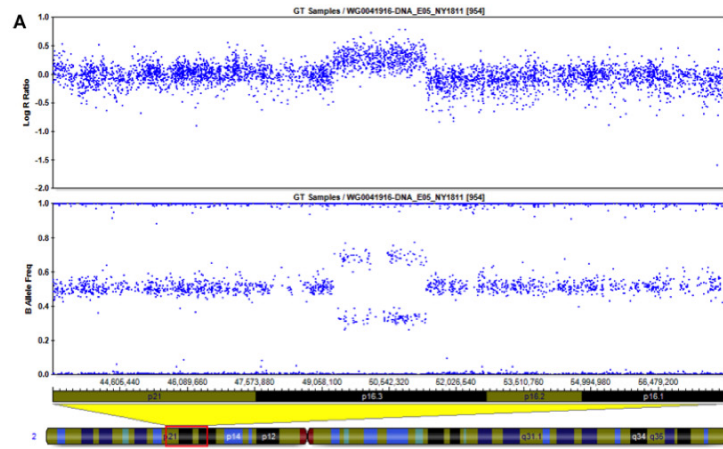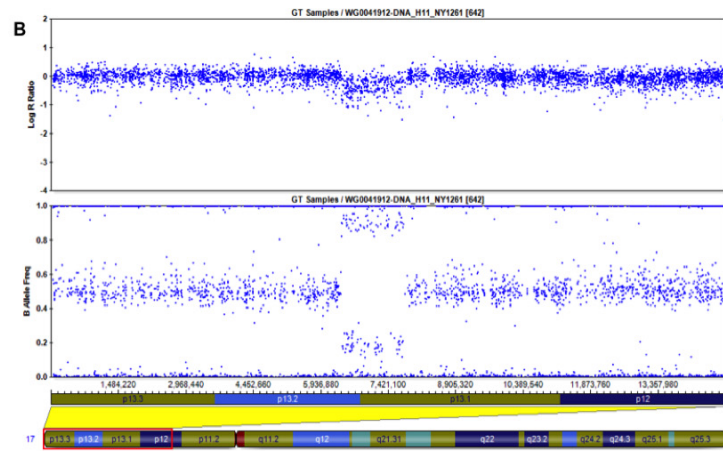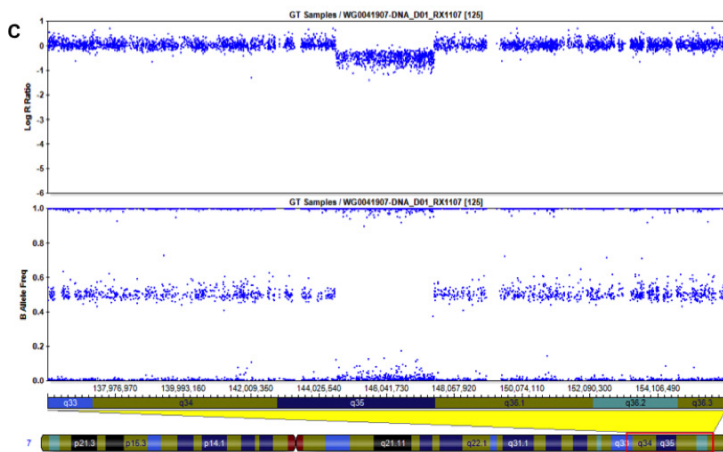

**Figure S2** The examples of CNVs found only in AD patients but not in normal controls. (A) Increase in the log R ratio (top) and split in the B-allele frequency (bottom) are consistent with a partial duplication of chromosome 2p16.3. (B) Decrease in the log R ratio (top) and “0 or 1” frequency of the B-allele (bottom) are consistent with a partial deletion of chromosome 17p13.1-p13.2. (C) Decrease in the log R ratio (top) and “0 or 1” frequency of the B-allele (bottom) are consistent with a partial deletion of chromosome 7q35-q36.1.

**Table S1 Chromosomal abnormalities larger than 7.5Mb detected during QC.**

| SampleID | Disease status | Age-at-diagnosis | Gender | chromosome    | hg18_chr:start-end                                  | Anomaly type <sup>a</sup>                                                                                                          | Comments                                                                                     |
|----------|----------------|------------------|--------|---------------|-----------------------------------------------------|------------------------------------------------------------------------------------------------------------------------------------|----------------------------------------------------------------------------------------------|
| NY0243   | AD             | 83               | F      | 1q.arm        | whole arm                                           | b.allele.freq.split                                                                                                                | mosaicism                                                                                    |
| NY2512   | AD             | 82               | M      | 4q.arm        | whole arm                                           | b.allele.freq.split                                                                                                                | mosaicism                                                                                    |
| NY0790   | AD             | 79               | F      | 4q.arm        | whole arm                                           | b.allele.freq.split                                                                                                                | mosaicism (almost LOH)                                                                       |
| NY1466   | Control        | na               | F      | 8q.arm        | whole arm                                           | b.allele.freq.split                                                                                                                | mosaicism                                                                                    |
| NY1952   | AD             | 75               | F      | 12            | chr6:129Mb-166Mb;<br>chr7:110Mb-141Mb; whole chr.12 | 6q22.31-q27.low.inten,<br>b.allele.freq.split; 7q31.1-q33.low.inten, b.allele.freq.split;<br>chr12.high.inten, b.allele.freq.split | 2 partial deletions (37Mb; 6q22.31-q27) (31Mb; 7q31.1-q33); whole chr.12 duplication-mosaic? |
| NY0823   | AD             | 68               | F      | 12            | whole chr                                           | high.inten, b.allele.freq.split                                                                                                    | whole duplication of chr.12                                                                  |
| NY0190   | AD             | 65               | M      | 12            | whole chr                                           | high.inten, b.allele.freq.split                                                                                                    | whole duplication of chr.12                                                                  |
| NY1183   | AD             | 90               | F      | 14            | whole chr                                           | b.allele.freq.split                                                                                                                | mosaicism (almost LOH)                                                                       |
| RM4013   | Control        | 88               | M      | 14q31.3-q32.3 | chr14:47Mb-106Mb                                    | b.allele.freq.split                                                                                                                | mosaicism (almost LOH)                                                                       |
| NY1317   | AD             | 76               | F      | 16p.arm       | whole p arm; ROH at chr16:56.7Mb-78.2Mb             | 16p.arm.b.allele.freq.split;<br>(note:there is also a 16q21-q23.1.ROH)                                                             | 16p.arm.mosaicism                                                                            |
| RM1150   | AD             | 87               | M      | 18p.arm       | whole arm                                           | b.allele.freq.split                                                                                                                | mosaicism                                                                                    |
| NY0489   | AD             | 67               | M      | 20q11.21-q33  | chr20:31Mb-42Mb                                     | low.inten, b.allele.freq.split                                                                                                     | partial deletion (11Mb; 20q11.21-q33)                                                        |
| NY1418   | AD             | 85               | F      | X             | whole chr.                                          | b.allele.freq.split                                                                                                                | mosaicism                                                                                    |

Samples including cases and controls that passed all QC filters and showed CNVs by any algorithm larger than 7.5 Mb on any of the autosomes or chr X were further inspected manually by plotting their log2 ratio intensities as well as allelic genotype ratios. A molecular size cutoff of >7.5 Mb was selected to be consistent with

---

large cytogenetically visible chromosome abnormalities.

na, not available; ROH,  
run of homozygosity

<sup>a</sup>Karyotype information  
was not available

**Table S2 Rare CNV calls with  $\geq 100$  Kb in AD cases and controls**

Table S2 is available for download at <http://www.g3journal.org/lookup/suppl/doi:10.1534/g3.111.000869/-/DC1/TableS2.xls> as an excel file.

**Table S3 CNVs larger than 1 Mb in AD cases and controls. Eight AD cases and four controls showed CNVs >1Mb. Six such large CNVs were found only in AD cases but were absent in Hispanic controls and DGV.**

Table S3 is available for download at <http://www.g3journal.org/lookup/suppl/doi:10.1534/g3.111.000869/-/DC1/TableS3.xls> as an excel file.

**Table S4 1774 stringent CNVs with sizes  $\geq 100$  Kb passed the QC steps in the 392 cases and 357 controls (mean size = 252,651 bp; median size =176,893 bp).**

Table S4 is available for download at <http://www.g3journal.org/lookup/suppl/doi:10.1534/g3.111.000869/-/DC1/TableS4.xls> as an excel file.
