# Supplementary material for: Genome-Wide Survey of Large Rare Copy Number Variants in Alzheimer’s Disease Among Caribbean Hispanics
Source: PubMed Central journal article supplement (PMC3276183; doi:10.1534/g3.111.000869), 2012-01-01
Supplement: supp_2.1.71_FigureS1.pdf [file supp_2.1.71_FigureS1.pdf]

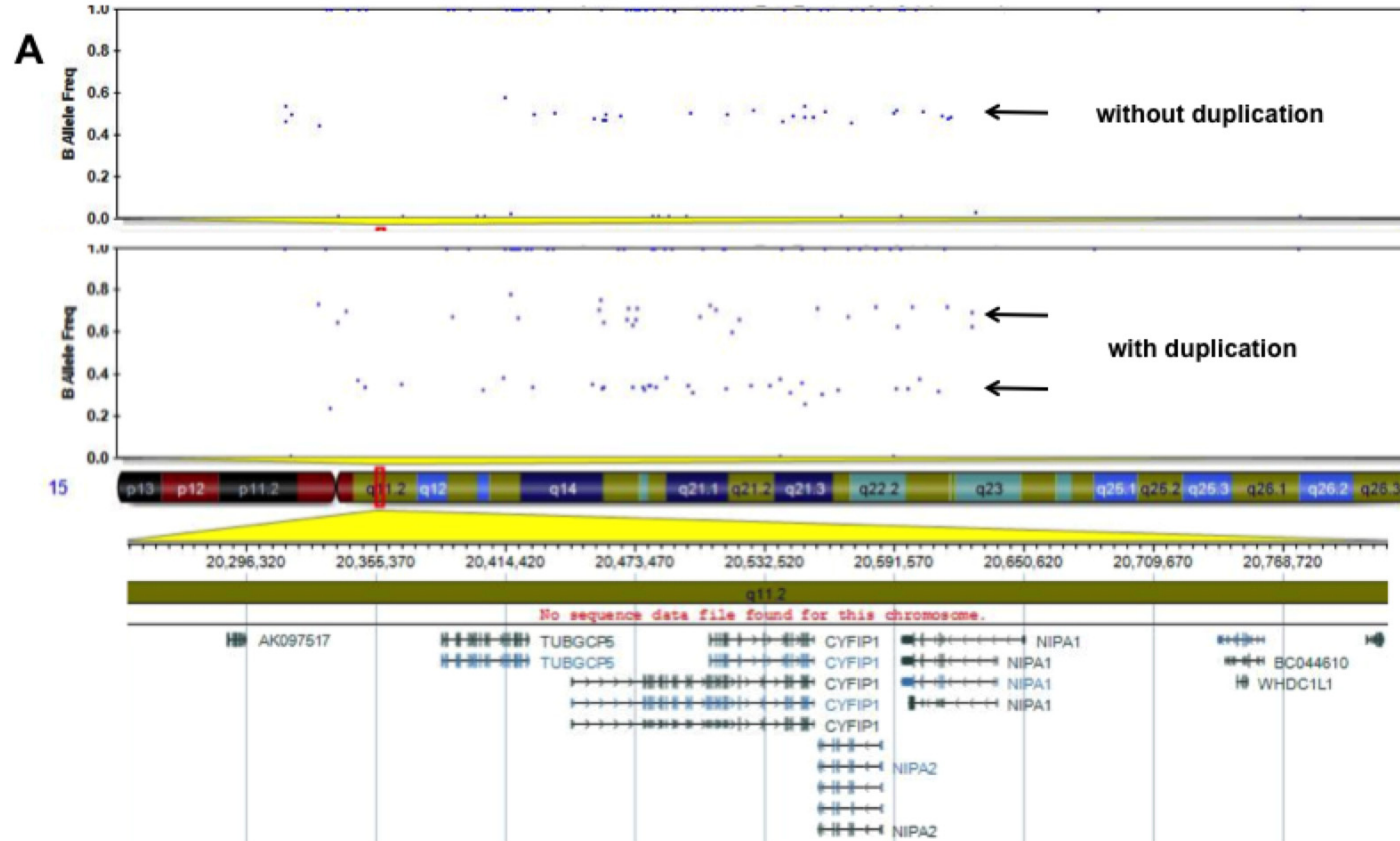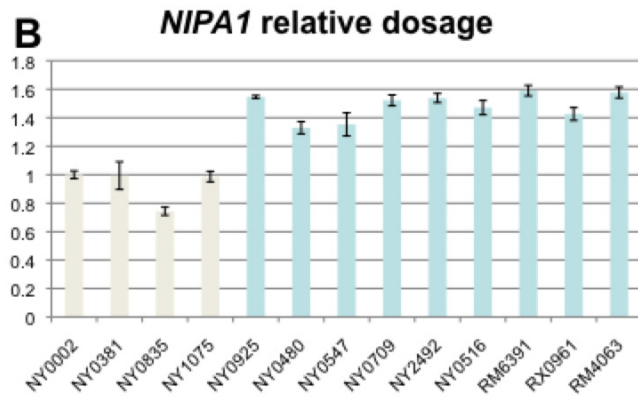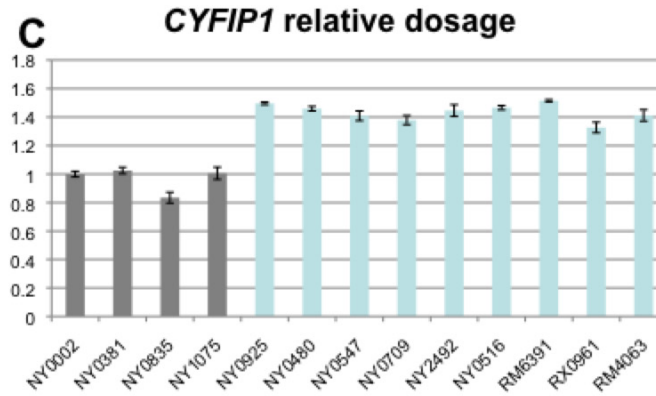

**Figure S1** Analyses of a duplication on chromosome 15q11.2. (A) A split in the B-allele frequency was observed in 10 cases and 3 controls due to a duplication of chromosome 15q11.2. (B) and (C) show the results of quantitative PCR that confirmed the presence of a duplication for the NIPA1 and CYFIP1 loci, respectively. The samples with duplications are highlighted in blue.
