# Supplementary material for: Genome-Wide Survey of Large Rare Copy Number Variants in Alzheimer’s Disease Among Caribbean Hispanics
Source: PubMed Central journal article supplement (PMC3276183; doi:10.1534/g3.111.000869), 2012-01-01
Supplement: supp_2.1.71_FigureS2.pdf [file supp_2.1.71_FigureS2.pdf]

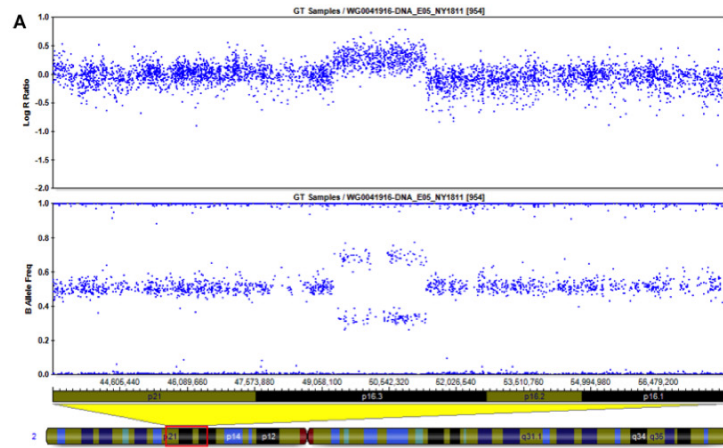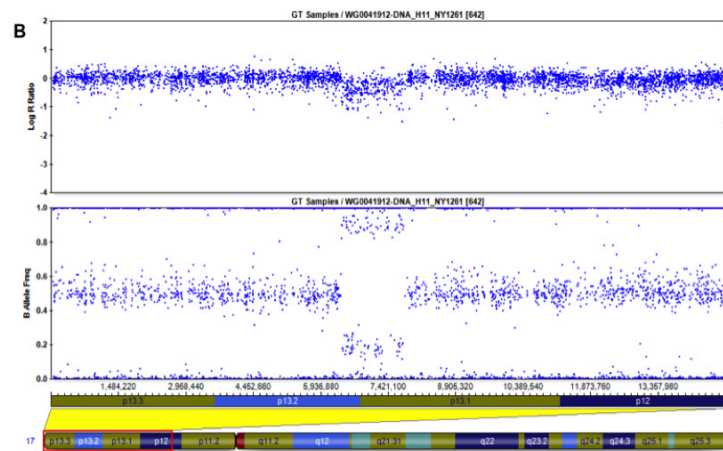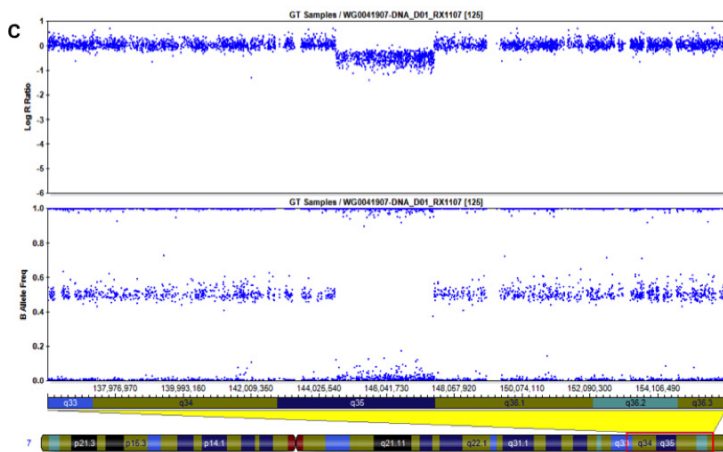

**Figure S2** The examples of CNVs found only in AD patients but not in normal controls. (A) Increase in the log R ratio (top) and split in the B-allele frequency (bottom) are consistent with a partial duplication of chromosome 2p16.3. (B) Decrease in the log R ratio (top) and “0 or 1” frequency of the B-allele (bottom) are consistent with a partial deletion of chromosome 17p13.1-p13.2. (C) Decrease in the log R ratio (top) and “0 or 1” frequency of the B-allele (bottom) are consistent with a partial deletion of chromosome 7q35-q36.1.
