# Supplementary material for: Genome-Wide Survey of Large Rare Copy Number Variants in Alzheimer’s Disease Among Caribbean Hispanics
Source: PubMed Central journal article supplement (PMC3276183; doi:10.1534/g3.111.000869), 2012-01-01
Supplement: supp_2.1.71_TableS1.pdf [file supp_2.1.71_TableS1.pdf]

**Table S1 Chromosomal abnormalities larger than 7.5Mb detected during QC.**

| SampleID | Disease status | Age-at-diagnosis | Gender | chromosome                            | hg18_chr:start-end                                     | Anomaly type <sup>a</sup>                                                                                                              | Comments                                                                                           |
|----------|----------------|------------------|--------|---------------------------------------|--------------------------------------------------------|----------------------------------------------------------------------------------------------------------------------------------------|----------------------------------------------------------------------------------------------------|
| NY0243   | AD             | 83               | F      | 1q.arm                                | whole arm                                              | b.allele.freq.split                                                                                                                    | mosaicism                                                                                          |
| NY2512   | AD             | 82               | M      | 4q.arm                                | whole arm                                              | b.allele.freq.split                                                                                                                    | mosaicism                                                                                          |
| NY0790   | AD             | 79               | F      | 4q.arm                                | whole arm                                              | b.allele.freq.split                                                                                                                    | mosaicism (almost LOH)                                                                             |
| NY1466   | Control        | na               | F      | 8q.arm                                | whole arm                                              | b.allele.freq.split                                                                                                                    | mosaicism                                                                                          |
| NY1952   | AD             | 75               | F      | 6q22.31-q27;<br>7q31.1-q33;<br>chr.12 | chr6:129Mb-166Mb;<br>chr7:110Mb-141Mb; whole<br>chr.12 | 6q22.31-q27.low.inten,<br>b.allele.freq.split; 7q31.1-<br>q33.low.inten, b.allele.freq.split;<br>chr12.high.inten, b.allele.freq.split | 2 partial deletions (37Mb; 6q22.31-q27)<br>(31Mb; 7q31.1-q33); whole chr.12<br>duplication-mosaic? |
| NY0823   | AD             | 68               | F      | 12                                    | whole chr                                              | high.inten, b.allele.freq.split                                                                                                        | whole duplication of chr.12                                                                        |
| NY0190   | AD             | 65               | M      | 12                                    | whole chr                                              | high.inten, b.allele.freq.split                                                                                                        | whole duplication of chr.12                                                                        |
| NY1183   | AD             | 90               | F      | 14                                    | whole chr                                              | b.allele.freq.split                                                                                                                    | mosaicism (almost LOH)                                                                             |
| RM4013   | Control        | 88               | M      | 14q31.3-q32.3                         | chr14:47Mb-106Mb                                       | b.allele.freq.split                                                                                                                    | mosaicism (almost LOH)                                                                             |
| NY1317   | AD             | 76               | F      | 16p.arm                               | whole p arm; ROH at<br>chr16:56.7Mb-78.2Mb             | 16p.arm.b.allele.freq.split;<br>(note:there is also a 16q21-<br>q23.1.ROH)                                                             | 16p.arm.mosaicism                                                                                  |
| RM1150   | AD             | 87               | M      | 18p.arm                               | whole arm                                              | b.allele.freq.split                                                                                                                    | mosaicism                                                                                          |
| NY0489   | AD             | 67               | M      | 20q11.21-q33                          | chr20:31Mb-42Mb                                        | low.inten, b.allele.freq.split                                                                                                         | partial deletion (11Mb; 20q11.21-q33)                                                              |
| NY1418   | AD             | 85               | F      | X                                     | whole chr.                                             | b.allele.freq.split                                                                                                                    | mosaicism                                                                                          |

Samples including cases and controls that passed all QC filters and showed CNVs by any algorithm larger than 7.5 Mb on any of the autosomes or chr X were further inspected manually by plotting their log2 ratio intensities as well as allelic genotype ratios. A molecular size cutoff of >7.5 Mb was selected to be consistent with

---

large cytogenetically visible chromosome abnormalities.

na, not available; ROH,  
run of homozygosity

<sup>a</sup>Karyotype information  
was not available
